# Supplementary material for: Leveraging correlations between variants in polygenic risk scores to detect heterogeneity in GWAS cohorts
Source: PLOS journal article supplement (doi:10.1371/journal.pgen.1009015), 2020-09-21
Supplement: S7 (10.1371/journal.pgen.1009015.s007) [file journal.pgen.1009015.s007]

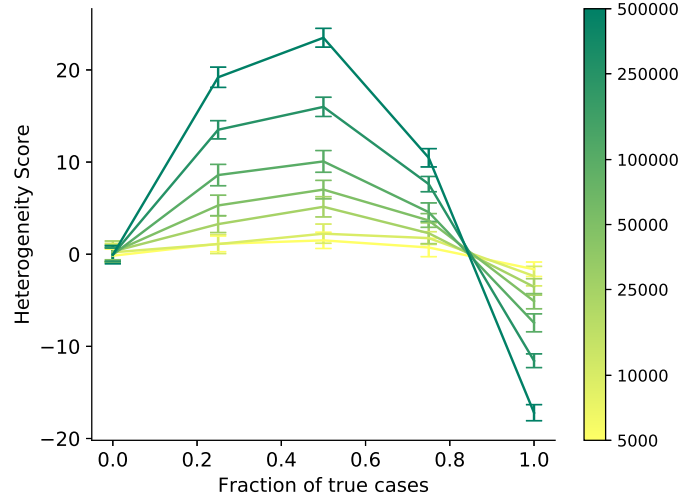

S3 Fig. **CLiP performance as a function of subtype fraction size.** Heterogeneity scores (y-axis) evaluated on heterogeneous cohorts comprising a mixture of true cases and controls at different proportions (x-axis). Colors indicate the total cohort size. The X-axis indicates the fraction of individuals that are true cases. When the fraction is 0, the cohort contains only controls, and all expected correlations are 0, producing a heterogeneity score of 0. When the fraction is 1, the cohort contains only cases, and produces a highly negative score due to negative correlations between all pairs of SNPs. As expected, a mixture of cases and controls produces positive scores, with the peak score occurring when the cohort is split evenly. More detailed results of this set of simulations are shown in 2 Table. All tests were conducted with a SNP variance explained of 0.05.
